# Supplementary material
Source: publisher figshare collection journal article supplement (https://acs.figshare.com/ndownloader/files/15320087)
Supplement: Supplementary file 1 [file 15320087]

Compound_ID,SMILES,compound name
1a,CSC1=CC=C(C(CCCCl)=O)C=C1,4-chloro-1-(4-(methylthio)phenyl)butan-1-one
1b,CSC1=CC=C(C(CCCCCl)=O)C=C1,5-chloro-1-(4-(methylthio)phenyl)pentan-1-one
2a,CS(C1=CC=C(C(CCCCl)=O)C=C1)(=O)=O,4-chloro-1-(4-(methylsulfonyl)phenyl)butan-1-one
2b,CS(C1=CC=C(C(CCCCCl)=O)C=C1)(=O)=O,5-chloro-1-(4-(methylsulfonyl)phenyl)pentan-1-one
3a,O=S(C(C=C1)=CC=C1/C(CCCCl)=C(C2=CC=CC=C2)\C3=CC=CC=C3)(C)=O,5-chloro-2-(4-(methylsulfonyl)phenyl)pent-1-en-1,1-diyl)dibenzene
3b,O=S(C(C=C1)=CC=C1/C(CCCCl)=C(C2=CC=C(F)C=C2)\C3=CC=C(F)C=C3)(C)=O,4,4´-(5-chloro-2-(4-(methylsulfonyl)phenyl)pent-1-en-1,1-diyl)bis(fluorobenzene)
3c,O=S(C(C=C1)=CC=C1/C(CCCCCl)=C(C2=CC=CC=C2)\C3=CC=CC=C3)(C)=O,6-chloro-2-(4-(methylsulfonyl)phenyl)hex-1-en-1,1-diyl)dibenzene
3d,O=S(C(C=C1)=CC=C1/C(CCCCCl)=C(C2=CC=C(F)C=C2)\C3=CC=C(F)C=C3)(C)=O,4,4´-(6-chloro-2-(4-(methylsulfonyl)phenyl)hex-1-en-1,1-diyl)bis(fluorobenzene)
4a,O=S(C(C=C1)=CC=C1/C(CCCO[N+]([O-])=O)=C(C2=CC=CC=C2)\C3=CC=CC=C3)(C)=O,4-(4-(methylsulfonyl)phenyl)-5,5-diphenylpent-4-en-1-yl
4b,O=S(C(C=C1)=CC=C1/C(CCCO[N+]([O-])=O)=C(C2=CC=C(F)C=C2)\C3=CC=C(F)C=C3)(C)=O,5,5´-bis-(4-fluorophenyl)-4-(4-methylsulfonyl)phenyl)pent-4-en-1-yl
4c,O=S(C(C=C1)=CC=C1/C(CCCCO[N+]([O-])=O)=C(C2=CC=CC=C2)\C3=CC=CC=C3)(C)=O,5-(4-(methylsulfonyl)phenyl)-6,6-diphenylhex-5-en-1-yl
4d,O=S(C(C=C1)=CC=C1/C(CCCCO[N+]([O-])=O)=C(C2=CC=C(F)C=C2)\C3=CC=C(F)C=C3)(C)=O,6,6´-bis(4-fluorophenyl)-5-(4-(methylsulfonyl)phenyl)hex-5-en-1-yl
5a,O=S(C(C=C1)=CC=C1/C(CCCO)=C(C2=CC=CC=C2)\C3=CC=CC=C3)(C)=O,4-(4-(methylsulfonyl)phenyl)-5,5-diphenylpent-4-en-1-ol
5b,O=S(C(C=C1)=CC=C1/C(CCCO)=C(C2=CC=C(F)C=C2)\C3=CC=C(F)C=C3)(C)=O,5,5´-bis-(4-fluorophenyl)-4-(4-methylsulfonyl)phenyl)pent-4-en-1-ol
5c,O=S(C(C=C1)=CC=C1/C(CCCCO)=C(C2=CC=CC=C2)\C3=CC=CC=C3)(C)=O,5-(4-(methylsulfonyl)phenyl)-6,6-diphenylhex-5-en-1-ol
5d,O=S(C(C=C1)=CC=C1/C(CCCCO)=C(C2=CC=C(F)C=C2)\C3=CC=C(F)C=C3)(C)=O,6,6´-bis(4-fluorophenyl)-5-(4-(methylsulfonyl)phenyl)hex-5-en-1-ol
6,CSC1=CC=C(C(CCCC)=O)C=C1,1-(4-(methylthio)phenyl)pentan-1-one
7,CS(C1=CC=C(C(CCCC)=O)C=C1)(=O)=O,1-(4-(methylsulfonyl)phenyl)pentan-1-one
8,CS(C(C=C1)=CC=C1/C(CCCC)=C(C2=CC=C(F)C=C2)/C3=CC=C(F)C=C3)(=O)=O,4,4´-(2-(4-(methylsulfonyl)phenyl)hex-1-ene-1,1-diyl)bis(fluorobenzene)
